# Supplementary material for: Current Clinical Landscape and Global Potential of Bacteriophage Therapy
Source: MDPI journal article supplement (doi:10.3390/v15041020), 2023-04-21
Supplement: s1 [file s1]

**Table S1. Research labs at universities and institutions that study phages.**

| <b>Country</b>   | <b>Institutions</b>                                    |                                         |
|------------------|--------------------------------------------------------|-----------------------------------------|
| <b>USA</b>       | University of California San Diego                     | Des Moines University                   |
|                  | Stanford University                                    | Calvin University                       |
|                  | San Diego State University                             | University of Colorado                  |
|                  | UC Irvine                                              | University of Alabama                   |
|                  | Johns Hopkins University                               | Old Dominion University                 |
|                  | University of Maryland                                 | Virginia Commonwealth University        |
|                  | U.S. Navy Medical Research Center                      | American Type Culture Collection (ATCC) |
|                  | Walter Reed Army Institute of Research                 | University of Florida                   |
|                  | J. Craig Venter Institute                              | Hanover College                         |
|                  | McDaniel College                                       | Bethany College                         |
|                  | Georgia Institute of Technology                        | University of Central Oklahoma          |
|                  | Emory University                                       | Cornell University                      |
|                  | University of Northern Iowa                            | Queens College                          |
|                  | University of Pennsylvania                             | Rochester Institute of Technology       |
|                  | University of Pittsburg                                | Texas A&M<br>Michigan State University  |
|                  | Baylor College of Medicine                             | Duke University                         |
| <b>Canada</b>    | University of Alberta                                  |                                         |
|                  | d'Herelle Reference Center for Bacterial Viruses       |                                         |
|                  | McMaster University                                    |                                         |
|                  | University of Waterloo                                 |                                         |
|                  | National Research Council Canada                       |                                         |
|                  | Université Laval                                       |                                         |
| <b>Mexico</b>    | Centra de Investigación y de Estudios Avanzados        |                                         |
|                  | CIBA-IPN                                               |                                         |
|                  | Universidad Autónoma de Ciudad Juárez                  |                                         |
| <b>Brazil</b>    | University Center SENAI CIMATEC                        |                                         |
|                  | University of São Paulo                                |                                         |
|                  | Universidade Federal do Pará                           |                                         |
|                  | Universidade do Estado do Amazonas                     |                                         |
| <b>Venezuela</b> | Universidad Simón Bolívar                              |                                         |
| <b>Ecuador</b>   | Universidad de las Fuerzas Armadas – ESPE              |                                         |
| <b>Chile</b>     | Pontificia Universidad Catolica de Valparaíso          |                                         |
| <b>Kenya</b>     | Jomo Kenyatta University of Agriculture and Technology |                                         |
|                  | University of Nairobi                                  |                                         |

**Table S1. Research labs at universities and institutions that study phages.**

|                    |                                                |                                              |
|--------------------|------------------------------------------------|----------------------------------------------|
| <b>Egypt</b>       | Center for Microbiology and Phage Therapy      |                                              |
|                    | Zewail City of Science and Technology          |                                              |
| <b>Nigeria</b>     | Plateau State University Bokkos                |                                              |
| <b>Ethiopia</b>    | Jimma University                               |                                              |
| <b>Australia</b>   | Australian Phage Biobanking Network            | Flinders University of South Australia       |
|                    | University of Sydney                           | Macquarie University                         |
|                    | Massey University                              | Monash University                            |
|                    | University of Adelaide                         | La Trobe University                          |
|                    | University of Western Australia                |                                              |
| <b>Singapore</b>   | National University of Singapore               |                                              |
|                    | Nanyang Technological University               |                                              |
| <b>South Korea</b> | Bacteriophage Bank of Korea                    |                                              |
|                    | Seoul National University                      |                                              |
| <b>Israel</b>      | Hebrew University and Hadassah Medical Center  |                                              |
|                    | The Volcani Institute                          |                                              |
| <b>India</b>       | Indian Institute of Science                    | National Centre for Veterinary Type Cultures |
|                    | Panjab University                              | SRM Institute of Science and Technology      |
|                    | Bhabha Atomic Research Centre                  | Karnatak University Dharwad                  |
|                    | ICMR-NICED                                     | University of Madras                         |
|                    | Vellore Institute of Technology                | Amrita Vishwa Vidyapeetham                   |
|                    | Cochin University of Science and Technology    |                                              |
| <b>China</b>       | Wuhan Institute of Virology                    |                                              |
|                    | Fudan University                               |                                              |
| <b>Pakistan</b>    | University of Punjab                           |                                              |
|                    | Hazara University                              |                                              |
|                    | University of Haripur                          |                                              |
| <b>Nepal</b>       | Tribhuvan University                           |                                              |
| <b>Indonesia</b>   | University of Jember                           |                                              |
|                    | National Research and Innovation Agency        |                                              |
| <b>Thailand</b>    | Silpakorn University                           |                                              |
| <b>Iran</b>        | University of Isfahan                          |                                              |
| <b>Japan</b>       | Rakuno Gakuen University                       |                                              |
| <b>Turkey</b>      | Mikroliz Therapeutic Bacteriophage Bank (MTBB) |                                              |

**Table S1. Research labs at universities and institutions that study phages.**

|                       |                                                                      |                                                           |
|-----------------------|----------------------------------------------------------------------|-----------------------------------------------------------|
| <b>Philippines</b>    | University of Santo Tomas                                            |                                                           |
| <b>Germany</b>        | German Collection of Microorganisms and Cell Cultures                |                                                           |
|                       | Research – UFZ, Forschungszentrum Jülich                             |                                                           |
|                       | Planck Institute for Terrestrial Microbiology                        |                                                           |
|                       | Helmholtz Center for Environmental                                   |                                                           |
| <b>Italy</b>          | Experimental Zooprophyllactic Institute of Lazio and Tuscany         |                                                           |
| <b>Netherlands</b>    | TU Delft                                                             |                                                           |
| <b>Belgium</b>        | Queen Astrid Military Hospital                                       |                                                           |
|                       | Ghent University                                                     |                                                           |
| <b>United Kingdom</b> | University College of London                                         | University of Warwick                                     |
|                       | University of Manchester                                             | University of Sheffield                                   |
|                       | Canterbury Christ Church University                                  | National Collection of Type Cultures (NCTC)<br>Blower Lab |
|                       | University of Exeter                                                 | Durham University                                         |
|                       | University of Leicester                                              | Quadram Institute of Bioscience                           |
| <b>Georgia</b>        | Eliava Institute of Bacteriophages                                   |                                                           |
| <b>Spain</b>          | A Coruña Hospital, Centro Nacional de Biotecnología (CNB-CSIC)       |                                                           |
| <b>Switzerland</b>    | Zurich University of Applied Sciences                                |                                                           |
|                       | University of Lausanne                                               |                                                           |
|                       | Zürcher Hochschule für Angewandte Wissensch (ZHAW)                   |                                                           |
| <b>Sweden</b>         | Lund University                                                      |                                                           |
| <b>Ireland</b>        | APC Microbiome                                                       |                                                           |
|                       | Teagasc                                                              |                                                           |
|                       | Cork Institute of Technology                                         |                                                           |
| <b>Poland</b>         | Hirsfeld Institute of Immunology and Experimental Therapy            |                                                           |
|                       | University of Wrocław                                                |                                                           |
| <b>Portugal</b>       | University of Aveiro                                                 |                                                           |
| <b>Russia</b>         | Federal Service for the Oversight of Consumer Protection and Welfare |                                                           |

\* Laboratories and bacteriophage banks listed are based on the online phage directory (available at: <https://phage.directory>) and do not include biotechnology companies or start-ups. This table may not be all inclusive.
